# Supplementary material for: Glycan shield of the ebolavirus envelope glycoprotein GP
Source: PubMed Central journal article supplement (PMC9352669; doi:10.1038/s42003-022-03767-1), 2022-08-04
Supplement: 42003_2022_3767_MOESM1_ESM.pdf [file 42003_2022_3767_MOESM1_ESM.pdf]

Supplementary Information to:

## **Glycan shield of the ebolavirus envelope glycoprotein GP**

Weiwei Peng <sup>1</sup>, Vamseedhar Rayaprolu <sup>2,4</sup>, Amar D. Parvate <sup>2,5</sup>, Matti F. Pronker <sup>1</sup>, Sean Hui <sup>2,6</sup>,  
Diptiben Parekh <sup>2</sup>, Kelly Shaffer <sup>2,7</sup>, Xiaoying Yu <sup>2</sup>, Erica O. Saphire <sup>2,3</sup>, Joost Snijder <sup>1\*</sup>

<sup>1</sup> Biomolecular Mass Spectrometry and Proteomics, Bijvoet Center for Biomolecular Research and Utrecht Institute of Pharmaceutical Sciences, Utrecht University, Padualaan 8, 3584 CH Utrecht, The Netherlands

<sup>2</sup> Center for Infectious Disease and Vaccine Discovery, La Jolla Institute for Immunology, La Jolla, CA 92037, USA.

<sup>3</sup> Department of Medicine, University of California, San Diego, La Jolla, CA 92039, USA

<sup>4</sup> Current affiliation - Pacific Northwest Center for CryoEM, Portland, OR 97225, USA

<sup>5</sup> Current affiliation - Environmental Molecular Sciences Laboratory, Pacific Northwest National Laboratory, Richland, WA 99354, USA

<sup>6</sup> Current affiliation – Molecular Microbiology and Microbial Pathogenesis Program, Washington University School of Medicine, Saint Louis, MO 63108, USA

<sup>7</sup> Current affiliation – Division of Biology and Biological Engineering, California Institute of Technology, Pasadena, CA 91125, USA

\*corresponding author: [j.snijder@uu.nl](mailto:j.snijder@uu.nl)

Supplementary Figures S1-S5



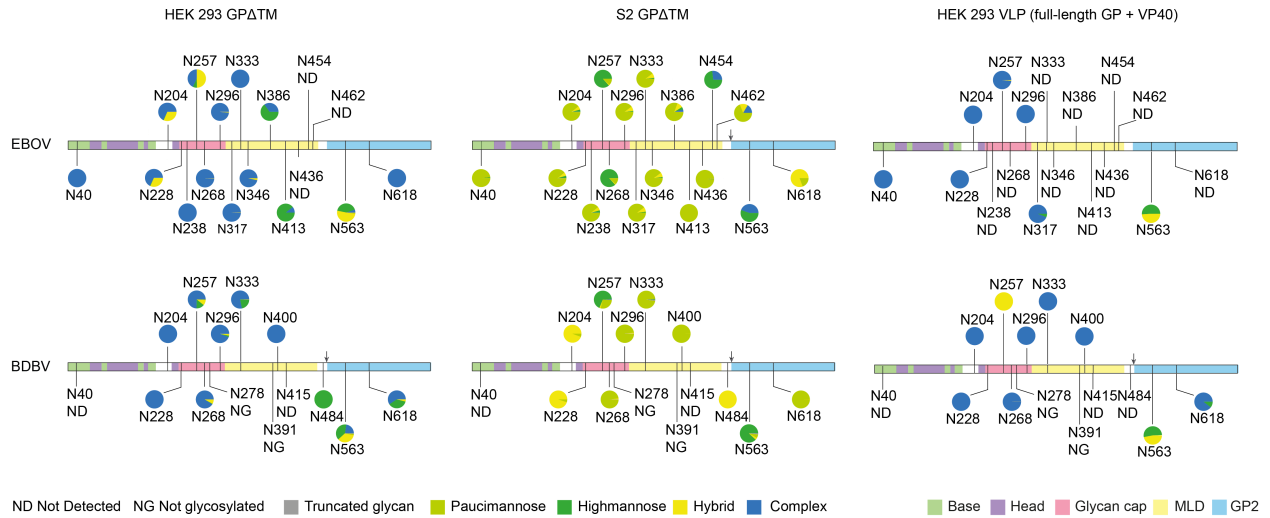

**Supplementary Figure S2.** Overview of site-specific N-linked glycan processing in ebola virus GPΔTM from HEK293 and S2 cells, versus full-length GP from HEK293 derived VLPs as determined by LC-MS/MS. The glycans were classified by HexNAc content as truncated, paucimannose, high-mannose, hybrid or complex. Shown is the average of a duplicate experiment.



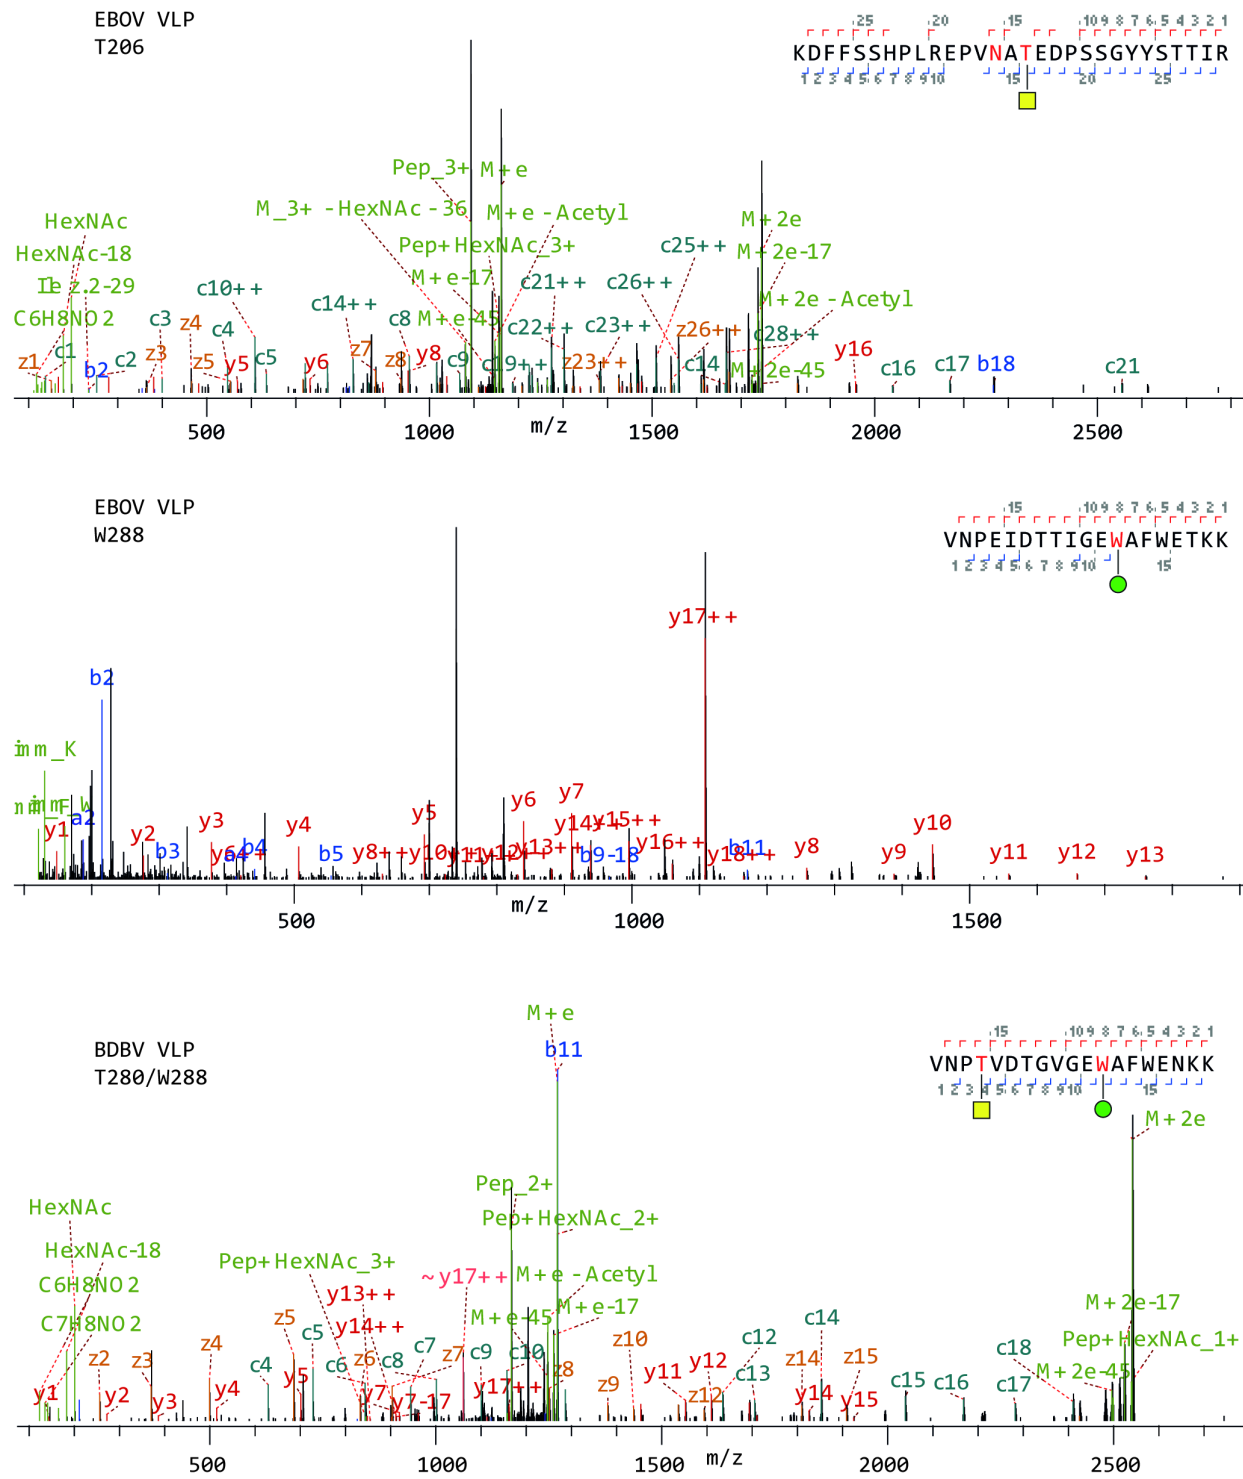

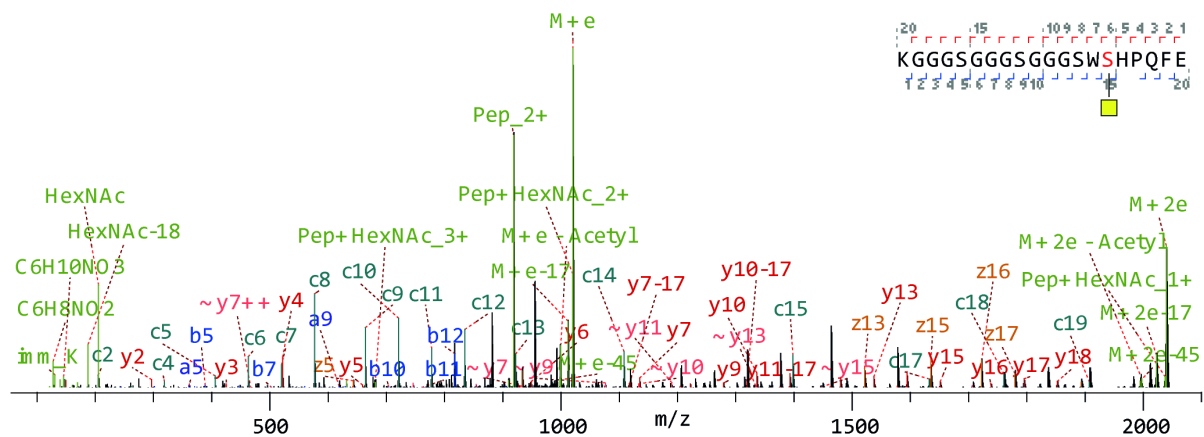

**Supplementary Figure S5.** MS/MS spectrum of glycopeptide from HEK293-derived BDBV GP $\Delta$ TM with O-linked glycosylation in the Strep-tag of the recombinant soluble ectodomain.
